# Supplementary material for: Structural study on the development of high-voltage Na4Co3(PO4)2P2O7 cathode materials for sodium-ion batteries by in situ and time-resolved X-ray diffraction
Source: Royal Society of Chemistry journal article supplement (doi:10.1039/d2ta01561g), 2022-01-01
Supplement: d2ta01561g1.pdf [file d2ta01561g1.pdf]

# Supporting Information

## Structural study on the development of high-voltage $\text{Na}_4\text{Co}_3(\text{PO}_4)_2\text{P}_2\text{O}_7$ cathode materials for sodium-ion batteries by in situ and time-resolved X-ray diffraction

Dong Hyun Kim<sup>a,b</sup>, Ji-Young Kim<sup>c</sup>, Min Kyung Cho<sup>c</sup>, Hyungseok Kim<sup>a,d</sup>, Sang-Ok Kim<sup>a,d</sup>, Kwang-Bum Kim<sup>b,\*</sup>, Kyung Yoon Chung<sup>a,d,\*</sup>

<sup>a</sup>Energy Storage Research Center, Korea Institute of Science and Technology (KIST), Hwarangno 14-gil 5, Seongbuk-gu, Seoul 02792, Republic of Korea

<sup>b</sup>Department of Material Science and Engineering, Yonsei University, 134 Shinchon-dong, Seodaemoon-gu, Seoul 03722, Republic of Korea

<sup>c</sup>Advanced Analysis and Data Center, Korea Institute of Science and Technology (KIST), Hwarangno 14-gil 5, Seongbuk-gu, Seoul 02792, Republic of Korea

<sup>d</sup>Division of Energy & Environment Technology, KIST School, Korea University of Science and Technology, Seoul 02792, Republic of Korea

Corresponding Authors:

\*Email address: kbkim@yonsei.ac.kr

\*Email address: kychung@kist.re.kr

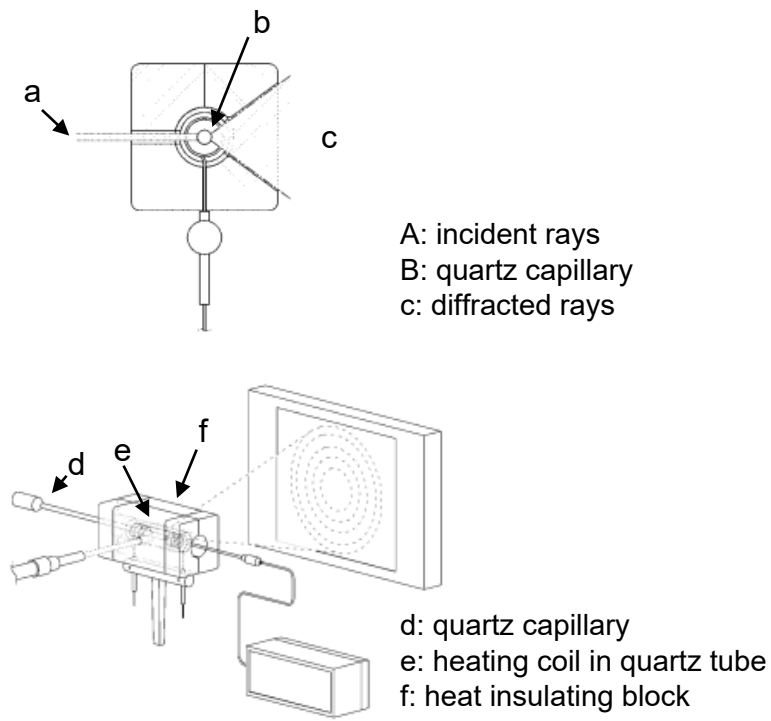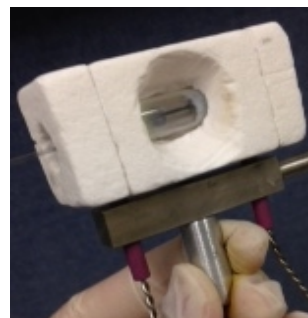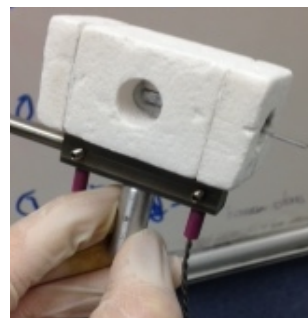

**Figure S1. Schematic and digital images of the TR-XRD test device for studying structural changes during heating.<sup>1</sup>**

1. Kim, D.H., et al., RT-XAMF and TR-XRD studies of solid-state synthesis and thermal stability of NaNiO<sub>2</sub> as cathode material for sodium-ion batteries. *Ceramics International*, 2022.

### (a) Calcination

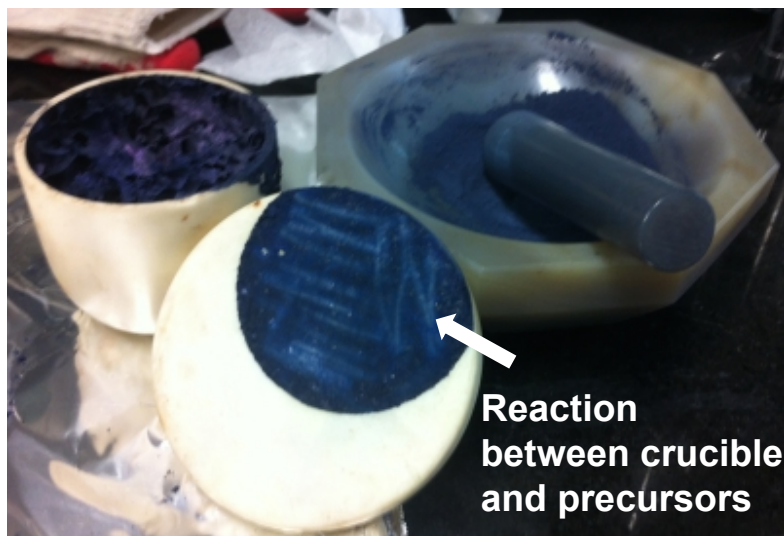

### (b) Sintering

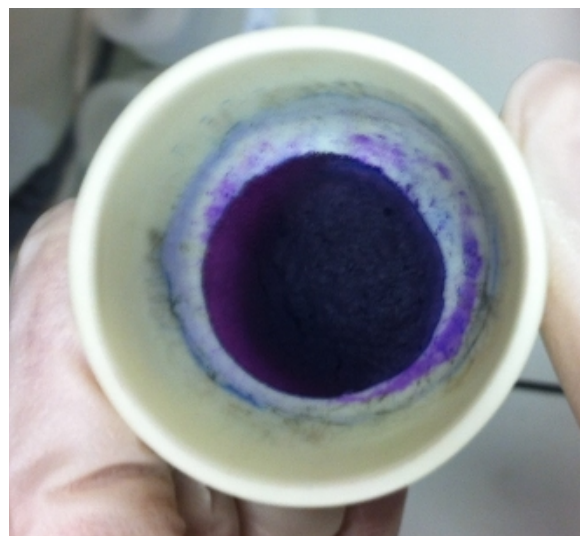

**Figure S2. Raw material loss caused by reaction with the container during the heat treatment process. (a) Calcination at 500 °C, and (b) sintering at 700~770 °C.**

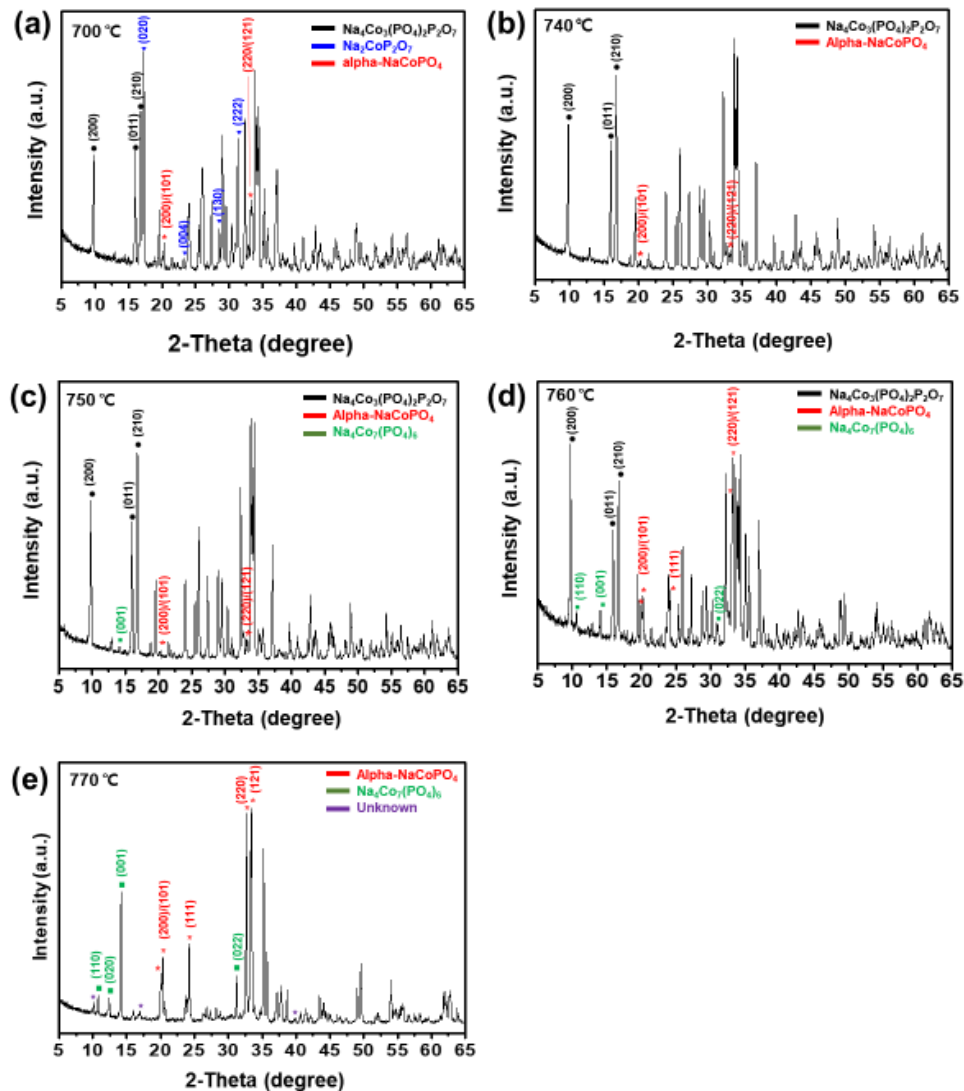

**Figure S3. XRD patterns of sodium cobalt phosphates synthesized at (a) 700 °C, (b) 740 °C, (c) 750 °C, (d) 760 °C, and (e) 770 °C.**

(a) Bare  $\text{Na}_4\text{Co}_3(\text{PO}_4)_2\text{P}_2\text{O}_7$  (in this study)

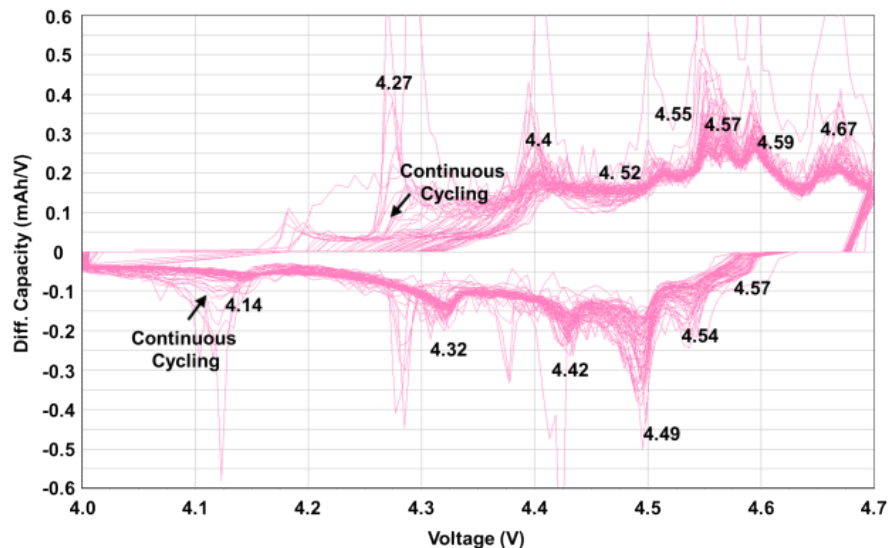

(b) Carbon-coated  $\text{Na}_4\text{Co}_3(\text{PO}_4)_2\text{P}_2\text{O}_7$

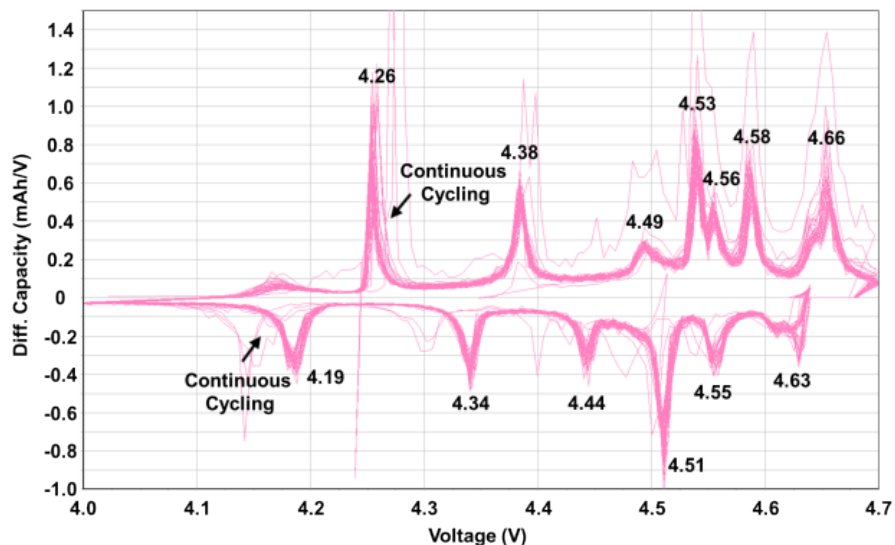

**Figure S4. Differential capacity (dQ/dV) vs. voltage of (a) the  $\text{Na}_4\text{Co}_3(\text{PO}_4)_2\text{P}_2\text{O}_7$  synthesized at 740 °C. For comparison of structural changes, dQ/dV data of (b) carbon-coated  $\text{Na}_4\text{Co}_3(\text{PO}_4)_2\text{P}_2\text{O}_7$  were included. Note that the  $\text{Na}_4\text{Co}_3(\text{PO}_4)_2\text{P}_2\text{O}_7$  used in this study is not carbon coated.**

|                                    | Na           | Co           | P            | Na/Co       | P/Co        |
|------------------------------------|--------------|--------------|--------------|-------------|-------------|
| <b>Theoretical molar ratio</b>     | <b>4</b>     | <b>3</b>     | <b>4</b>     | <b>1.33</b> | <b>1.33</b> |
| <b>Experimental value (mmol/L)</b> | <b>17.46</b> | <b>13.53</b> | <b>16.34</b> | <b>1.29</b> | <b>1.22</b> |
| <b>Calculated molar ratio</b>      | <b>3.87</b>  | <b>3.00</b>  | <b>3.65</b>  |             |             |

**Table S1. ICP data of  $\text{Na}_4\text{Co}_3(\text{PO}_4)_2\text{P}_2\text{O}_7$  synthesized at 740 °C.**

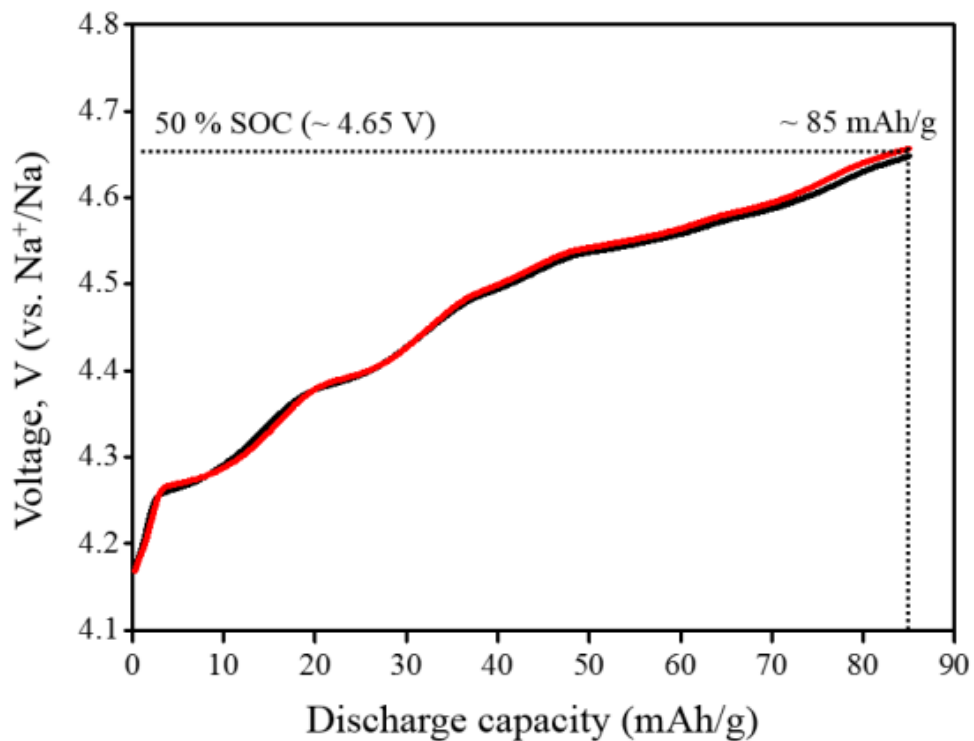

**Figure S4. Charge curves of  $\text{Na}_4\text{Co}_3(\text{PO}_4)_2\text{P}_2\text{O}_7$  cathodes for the preparation of charged  $\text{Na}_{4-x}\text{Co}_3(\text{PO}_4)_2\text{P}_2\text{O}_7$  ( $x = 2$ ) cathodes for TR-XRD.**
